# Supplementary material for: mARC1 Is the Main Contributor to Metabolic Reduction of N-Hydroxyurea
Source: PubMed Central journal article supplement (PMC11513889; doi:10.1021/acs.jmedchem.4c01148), 2024-10-14
Supplement: jm4c01148_si_001.pdf [file jm4c01148_si_001.pdf]

# Supporting information

## mARC1 is the main contributor to metabolic reduction of *N*-hydroxyurea

Cathrin Klopp<sup>1,2†</sup>, Xiaomei Zhang<sup>3†</sup>, Morgan K Campbell<sup>3</sup>, David Kvaskoff<sup>4</sup>, Michel A Struwe<sup>1,2</sup>, Curtis R Warren<sup>3</sup>, Besnik Bajrami<sup>4</sup>, Axel J Scheidig<sup>1</sup>, Amanda K Jones<sup>3</sup> and Bernd Clement<sup>2\*</sup>

<sup>1</sup> Zoological Institute – Structural Biology, Kiel University, 24118 Kiel, Germany

<sup>2</sup> Pharmaceutical Institute – Medicinal Chemistry, Kiel University, 24118 Kiel, Germany

<sup>3</sup> Boehringer Ingelheim Pharmaceuticals, Inc., Ridgefield, Connecticut 06877; Department of Cardiometabolic Disease Research

<sup>4</sup> Boehringer Ingelheim Pharma GmbH & Co., 88400 Biberach an der Riss, Germany; Department of Drug Discovery Sciences, Discovery Science Technologies (DK, BB)

\*Authors to whom correspondence should be addressed:

Email: bclement@pharmazie.uni-kiel.de

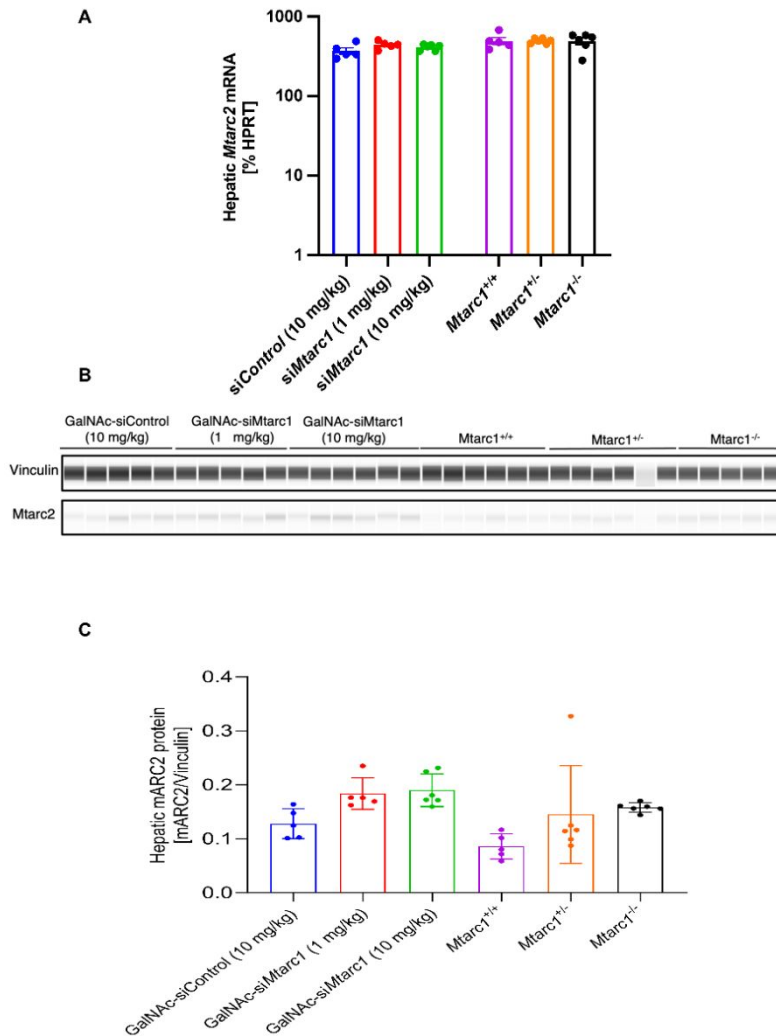

Supplementary Figure S1. Hepatic mRNA abundance of *Mtarc2* in mice treated with either GalNAc-siMtarc1 or genetically modified to remove *Mtarc1*. Panel A: Quantification of *mARC2* protein in mouse liver. Panel B: Representative immunoblot bands, Panel C: Ratio of hepatic *mARC2* protein to vinculin quantified by immunoblotting.
